# Supplementary material for: Fractional Flow Reserve Derived from Coronary Computed Tomography Angiography Safely Defers Invasive Coronary Angiography in Patients with Stable Coronary Artery Disease
Source: PubMed Central journal article supplement (PMC7074264; doi:10.3390/jcm9020604), 2020-02-24
Supplement: jcm-09-00604-s001.pdf [file jcm-09-00604-s001.pdf]

**Table S1. ICA Rates by Maximum Stenosis Classification on CTA Stratified by Available FFR<sub>CT</sub>.**

|                                         | ≤50%<br>(n = 263)   | >50%<br>(n = 121)    | Total<br>(n = 384)   |
|-----------------------------------------|---------------------|----------------------|----------------------|
| FFR <sub>CT</sub> is not available: ICA |                     |                      |                      |
| Yes                                     | 3 (21.4%)           | 11 (78.6%)           | 14 (50.0%)           |
| No                                      | 11 (78.6%)          | 3 (21.4%)            | 14 (50.0%)           |
| Rate (95% CI)                           | 21.43 (4.66, 50.80) | 78.57 (49.20, 95.34) | 50.00 (30.65, 69.35) |
| Fisher's Exact Test <i>p</i> -value     | 0.0070              |                      |                      |
| CMH $\chi^2$ <i>p</i> -value            | <.0001              |                      |                      |
| FFR <sub>CT</sub> is available: ICA     |                     |                      |                      |
| Yes                                     | 7 (2.8%)            | 44 (41.1%)           | 51 (14.3%)           |
| No                                      | 242 (97.2%)         | 61 (57.0%)           | 303 (85.1%)          |
| Missing                                 | 0                   | 2 (1.9%)             | 2 (0.6%)             |
| Rate (95% CI)                           | 2.81 (1.14, 5.71)   | 41.12 (31.70, 51.05) | 14.33 (10.86, 18.40) |
| Fisher's Exact Test <i>p</i> -value     | <0.0001             |                      |                      |

CI = confidence interval; ICA = invasive coronary angiogram. CMH = Cochran–Mantel–Haenszel.
